# Supplementary material for: ISPD mutations account for a small proportion of Italian Limb Girdle Muscular Dystrophy cases
Source: PubMed Central journal article supplement (PMC4582941; doi:10.1186/s12883-015-0428-8), 2015-09-24
Supplement: 12883_2015_428_MOESM1_ESM.pdf [file 12883_2015_428_MOESM1_ESM.pdf]

| Additional file 1 Molecular characterization of the LGMD cohort |     |       |                         |                          |      |                     |               |                                                        |            |                   |
|-----------------------------------------------------------------|-----|-------|-------------------------|--------------------------|------|---------------------|---------------|--------------------------------------------------------|------------|-------------------|
| Pt N.                                                           | Sex | Gene  | Allele 1                | Nucleotide 1             | Exon | Reference           | Allele 2      | Nucleotide 2                                           | Exon       | Reference         |
| 1                                                               | F   | LMNA  | c.1567G>A               | p.Gly523Arg              | 9    | <b>New</b>          | -             | -                                                      | -          | -                 |
| 2.1                                                             | M   | LMNA  | c.1489-2A>C             | Spl?                     | IVS8 | <b>New</b>          | -             | -                                                      | -          | -                 |
| 2.2                                                             | M   | LMNA  | c.1489-2A>C             | Spl?                     | IVS8 | <b>New</b>          | -             | -                                                      | -          | -                 |
| 3.1                                                             | M   | CAV3  | c.290_292del            | p.Phe97del               | 2    | Cagliani R., 2003   | -             | -                                                      | -          | -                 |
| 3.2                                                             | F   | CAV3  | c.290_292del            | p.Phe97del               | 2    | Cagliani R., 2003   | -             | -                                                      | -          | -                 |
| 3.3                                                             | M   | CAV3  | c.290_292del            | p.Phe97del               | 2    | Cagliani R., 2003   | -             | -                                                      | -          | -                 |
| 3.4                                                             | F   | CAV3  | c.290_292del            | p.Phe97del               | 2    | Cagliani R., 2003   | -             | -                                                      | -          | -                 |
| 3.5                                                             | M   | CAV3  | c.290_292del            | p.Phe97del               | 2    | Cagliani R., 2003   | -             | -                                                      | -          | -                 |
| 3.6                                                             | M   | CAV3  | c.290_292del            | p.Phe97del               | 2    | Cagliani R., 2003   | -             | -                                                      | -          | -                 |
| 3.7                                                             | M   | CAV3  | c.290_292del            | p.Phe97del               | 2    | Cagliani R., 2003   | -             | -                                                      | -          | -                 |
| 3.8                                                             | F   | CAV3  | c.290_292del            | p.Phe97del               | 2    | Cagliani R., 2003   | -             | -                                                      | -          | -                 |
| 3.9                                                             | M   | CAV3  | c.290_292del            | p.Phe97del               | 2    | Cagliani R., 2003   | -             | -                                                      | -          | -                 |
| 3.10                                                            | M   | CAV3  | c.290_292del            | p.Phe97del               | 2    | Cagliani R., 2003   | -             | -                                                      | -          | -                 |
| 4.1                                                             | M   | CAV3  | c.136G>A                | p.Ala46Thr               | 2    | Hermann R., 2000    | -             | -                                                      | -          | -                 |
| 4.2                                                             | F   | CAV3  | c.136G>A                | p.Ala46Thr               | 2    | Hermann R., 2000    | -             | -                                                      | -          | -                 |
| 5.1                                                             | F   | CAV3  | c.80G>A                 | p.Arg27Gln               | 1    | Carbone I, 2000     | -             | -                                                      | -          | -                 |
| 6.1                                                             | M   | CAV3  | c.169G>A                | p.Val57Met               | 2    | Alias L., 2004      | -             | -                                                      | -          | -                 |
| 7.1                                                             | M   | CAV3  | c.277G>A                | p.Ala93Thr               | 2    | Kubisch C, 2003     | c.277G>A      | p.Ala93Thr                                             | 2          | Kubisch C, 2003   |
| 8.1                                                             | M   | CAV3  | c.136G>A                | p.Ala46Thr               | 2    | Hermann R., 2000    | -             | -                                                      | -          | -                 |
| 8.2                                                             | F   | CAV3  | c.136G>A                | p.Ala46Thr               | 2    | Hermann R., 2000    | -             | -                                                      | -          | -                 |
| 8.3                                                             | F   | CAV3  | c.136G>A                | p.Ala46Thr               | 2    | Hermann R., 2000    | -             | -                                                      | -          | -                 |
| 9                                                               | M   | CAPN3 | c.1291C>A               | p.Val431Met              | 10   | Fanin M., 2004      | c.1342C>T     | p.Arg448Cys                                            | 10         | Richard I., 1995  |
| 10                                                              | F   | CAPN3 | c.1468C>T               | p.Arg490Trp              | 11   | Richard I., 1995    | c.1524G>A     | Spl?                                                   | 11         | Piluso G., 2005   |
| 11                                                              | M   | CAPN3 | c.1469G>A               | p.Arg490Gln              | 11   | Dincer P., 1997     | c.1469G>A     | p.Arg490Gln                                            | 11         | Dincer P., 1997   |
| 12                                                              | M   | CAPN3 | c.1381C>T               | p.Arg461Cys              | 11   | Minami N, 1999      | c.2242C>T     | p.Arg748X                                              | 21         | Fanin M., 2004    |
| 13                                                              | M   | CAPN3 | c.1466G>A               | p.Arg489Glu              | 11   | Richard I., 1999    | c.1711delC    | p.Leu571SerfsX23                                       | 13         | Guglieri M., 2007 |
| 14                                                              | M   | CAPN3 | c.848T>C                | p.Met283Thr              | 6    | Fanin M., 2004      | c.2115+4delT  | Spl?                                                   | IVS19      | <b>New</b>        |
| 15                                                              | F   | CAPN3 | c.550delA               | p.Thr184fsX36            | 4    | Restagno G., 1996   | c.1469G>A     | p.Arg490Gln                                            | 11         | Dincer P., 1997   |
| 16                                                              | F   | CAPN3 | c.620A>C                | p.Lys207Thr              | 4    | Groen EJ, 2007      | c.1746-20C>G  | Spl?                                                   | IVS13      | Piluso G., 2005   |
| 17                                                              | F   | CAPN3 | c.535G>C                | p.Asp179His              | 4    | Guglieri M., 2007   | c.1746-20C>G  | Spl?                                                   | IVS13      | Piluso G., 2005   |
| 18                                                              | M   | CAPN3 | c.848T>C                | p.Met283Thr              | 6    | Fanin M., 2004      | c.2115+4delT  | Spl?                                                   | IVS19      | <b>New</b>        |
| 19                                                              | F   | CAPN3 | c.1699G>T               | Gly567Trp                | 13   | Richard I., 1997    | c.1621C>T     | p.Arg541Trp                                            | 13         | Piluso G., 2005   |
| 20                                                              | F   | CAPN3 | c.1345A>C               | p.Asn449His              | 10   | Fanin M., 2004      | c.1345A>C     | p.Asn449His                                            | 10         | Fanin M., 2004    |
| 21                                                              | F   | CAPN3 | c.598_612del            | p.Phe200-Leu204del       | 4    | Guglieri M., 2007   | c.2380+1G>T   | exon 22 skipping + activation of a cryptic splice site | IVS22      | Guglieri M., 2007 |
| 22                                                              | M   | CAPN3 | c.801+1G>A              | Spl?                     | IVS5 | Haffner K., 1998    | c.550delA     | p.Thr184ArgfsX36                                       | 4          | Restagno G., 1996 |
| 23                                                              | M   | CAPN3 | c.1468C>T               | p.Arg490Trp              | 11   | Richard I., 1995    | c.2243G>A     | p.Arg748Gln                                            | 21         | Urtason M., 1998  |
| 24                                                              | M   | CAPN3 | c.883_884GA>CT; 887delA | p.Asp295Leu; Asn296Thrfs | 6    | Guglieri M., 2007   | c.2442G>A     | p.Trp814X                                              | 24         | Guglieri M., 2007 |
| 25.1                                                            | F   | CAPN3 | c.240C>T                | p.Phe80Leu               | 1    | <b>New</b>          | c.2184G>A     | Spl?                                                   | 20         | Piluso G., 2005   |
| 25.2                                                            | F   | CAPN3 | c.240C>T                | p.Phe80Leu               | 1    | <b>New</b>          | c.2184G>A     | Spl?                                                   | 20         | Piluso G., 2005   |
| 26                                                              | F   | CAPN3 | c.1309C>T               | p.Arg437Cys              | 10   | Guglieri M., 2007   | c.1993-1G>A   | Spl?                                                   | IVS17      | Richard I., 1997  |
| 27                                                              | M   | CAPN3 | c.610C>G                | p.Leu204Val              | 4    | Nascimbeni AC, 2010 | c.1585G>A     | p.Ala529Ser                                            | <b>New</b> |                   |
| 28                                                              | M   | CAPN3 | c.1469G>A               | p.Arg490Gln              | 11   | Dincer P., 1997     | c.1469G>A     | p.Arg490Gln                                            | 11         | Dincer P., 1997   |
| 29                                                              | F   | CAPN3 | c.1699G>T               | p.Gly567Trp              | 13   | Richard I., 1997    | c.1699G>T     | p.Gly567Trp                                            | 13         | Richard I., 1997  |
| 30                                                              | F   | CAPN3 | c.2330T>C               | p.Ile779Thr              | 22   | Fanin M., 2004      | c.550delA     | p.Thr184ArgfsX36                                       | 4          | Restagno G., 1996 |
| 31                                                              | F   | CAPN3 | c.1333G>A               | p.Gly445Arg              | 10   | Richard I., 1999    | c.2380+12delA | Spl?                                                   | IVS22      | Richard I., 1995  |

|      |   |       |                        |                     |      |                     |                        |                                       |       |                     |
|------|---|-------|------------------------|---------------------|------|---------------------|------------------------|---------------------------------------|-------|---------------------|
| 32   | M | CAPN3 | c.1063C>T              | p.Arg355Trp         | 8    | Horvath R., 2005    | c.457C>G               | p.Gln153Glu                           | 3     | <b>New</b>          |
| 33   | F | CAPN3 | c.1823G>A              | p.Arg608Lys         | 16   | Guglieri M., 2007   | c.1992+1G>T            | Spl?                                  | IVS17 | Leiden database     |
| 34   | M | CAPN3 | c.1468C>T              | p.Arg490Trp         | 11   | Richard I., 1995    | <b>c.1194-9A&gt;G</b>  | Spl?                                  | IVS9  | Krahn M, 2006       |
| 35   |   | CAPN3 | c.550delA              | p.Thr184fsX36       | 4    | Restagno G., 1996   | c.2439+2G>T            | Spl?                                  | IVS23 | <b>New</b>          |
| 36.1 | F | CAPN3 | c.328C>T               | p.Arg110X           | 2    | Richard I., 1999    | -                      | -                                     | -     | -                   |
| 36.2 | F | CAPN3 | c.328C>T               | p.Arg110X           | 2    | Richard I., 1999    | -                      | -                                     | -     | -                   |
| 37   | M | CAPN3 | c.2248C>T              | p.Arg748X           | 21   |                     | -                      | -                                     | -     | -                   |
| 38   | F | DYSF  | c.757C>T               | p.Arg253Trp         | 7    | Nguyen K., 2005     | c.90delA               | p.Lys33ArgfsX9                        | 2     | <b>New</b>          |
| 39   | F | DYSF  | c.5529G>A              | p.Trp1843X          | 50   | Guglieri M., 2007   | c.5529G>A              | p.Trp1843X                            | 50    | Guglieri M., 2007   |
| 40   | M | DYSF  | c.1911C>A              | p.Tyr637X           | 20   | Guglieri M., 2007   | c.1911C>A              | p.Tyr637X                             | 20    | Guglieri M., 2007   |
| 41   | M | DYSF  | c.5594delG             | p.Gly1865Ala fsX100 | 50   | Nguyen K., 2005     | c.5594delG             | p.Gly1865Ala fsX100                   | 50    | Nguyen K., 2005     |
| 42   | M | DYSF  | c.2875C>T              | p.Arg959Trp         | 27   | Cagliani R., 2005   | c.2875C>T              | p.Arg959Trp                           | 27    | Cagliani R., 2005   |
| 43   | F | DYSF  | c.457+2T>G             | Skipping exon 5     | IVS5 | Cagliani R., 2005   | c.2875C>T              | p.Arg959Trp                           | 27    | Cagliani R., 2005   |
| 44.1 | F | DYSF  | c.2875C>T              | p.Arg959Trp         | 27   | Cagliani R., 2005   | c.4003G>A              | p.Glu1335Lys                          | 37    | Cagliani R., 2003   |
| 44.2 | F | DYSF  | c.2875C>T              | p.Arg959Trp         | 27   | Cagliani R., 2005   | c.4003G>A              | p.Glu1335Lys                          | 37    | Cagliani R., 2003   |
| 45   | F | DYSF  | c.5626G>A              | p.Asp1876Asn        | 51   | Leiden database     | c.5626G>A              | p.Asp1876Asn                          | 51    | Leiden database     |
| 46   | F | DYSF  | c.1120G>C              | p.Val374Leu         | 12   | Cagliani R., 2005   | c.5033G>C              | p.Cys1678Ser                          | 45    | Cagliani R., 2005   |
| 47   | F | DYSF  | c.2200-2204del         | p.Trp734ProfsX17    | 23   | Aoki M., 2001       | c.5303G>T              | p.Arg1768Leu                          | 47    | <b>New</b>          |
| 48   | M | DYSF  | c.2875C>T              | p.Arg959Trp         | 27   | Cagliani R., 2005   | c.2875C>T              | p.Arg959Trp                           | 27    | Cagliani R., 2005   |
| 49   | M | DYSF  | c.1254delC             | p.Pro418ProfsX123   | 13   | Guglieri M., 2007   | c.1254delC             | p.Pro418ProfsX123                     | 13    | Guglieri M., 2007   |
| 50   | M | DYSF  | c.1254delC             | p.Pro418ProfsX123   | 13   | Guglieri M., 2007   | c.1254delC             | p.Pro418ProfsX123                     | 13    | Guglieri M., 2007   |
| 51   | F | DYSF  | c.1639delG             | fs con stop ex 20   | 19   | <b>New</b>          | c.3191-3196dup         | fs                                    | 30    | Therrien C, 2006    |
| 52.1 | M | DYSF  | c.2200_2204del         | p.Trp734ProfsX17    | 23   | Aoki M., 2001       | c.2200_2204del         | p.Trp734ProfsX17                      | 23    | Aoki M., 2001       |
| 52.2 | F | DYSF  | c.2200_2204del         | p.Trp734ProfsX17    | 23   | Aoki M., 2001       | c.2200_2204del         | p.Trp734ProfsX17                      | 23    | Aoki M., 2001       |
| 53.1 | F | DYSF  | c.2494C>T              | p.Gln832X           | 24   | Guglieri M., 2007   | c.2494C>T              | p.Gln832X                             | 24    | Guglieri M., 2007   |
| 53.2 | M | DYSF  | c.2494C>T              | p.Gln832X           | 24   | Guglieri M., 2007   | c.2494C>T              | p.Gln832X                             | 24    | Guglieri M., 2007   |
| 54.1 | M | DYSF  | c.2875C>T              | p.Arg959Trp         | 27   | Cagliani R., 2005   | c.5813_5821del         | p.Thr1938Lys del1939-1941 Ala-Lys-Lys | 52    | Nguyen K., 2005     |
| 54.2 | M | DYSF  | c.2875C>T              | p.Arg959Trp         | 27   | Cagliani R., 2005   | c.5813_5821del         | p.Thr1938Lys del1939-1941 Ala-Lys-Lys | 52    | Nguyen K., 2005     |
| 55.1 | M | DYSF  | c.3113G>A              | p.Arg1038Gln        | 29   | Cagliani R., 2005   | c.5979InsA             | p.Glu1994ArgfsX3                      | 53    | Anderson DY, 2000   |
| 55.2 | M | DYSF  | c.3113G>A              | p.Pro418Gln         | 29   | Cagliani R., 2005   | c.5979InsA             | p.Glu1994ArgfsX3                      | 53    | Anderson DY, 2000   |
| 56.1 | F | DYSF  | c.331C>T               | p.Gln111X           | 4    | Leiden database     | c.331C>T               | p.Gln111X                             | 4     | Leiden database     |
| 56.2 | F | DYSF  | c.331C>T               | p.Gln111X           | 4    | Leiden database     | c.331C>T               | p.Gln111X                             | 4     | Leiden database     |
| 57.1 | F | DYSF  | c.94A>T                | p.Lys32X            | 2    | <b>New</b>          | c.5440C>T              | p.Arg1814Cys                          | 49    | <b>New</b>          |
| 57.2 | F | DYSF  | c.94A>T                | p.Lys32X            | 2    | <b>New</b>          | c.5440C>T              | p.Arg1814Cys                          | 49    | <b>New</b>          |
| 58   | F | DYSF  | c.2875C>T              | p.Arg959Trp         | 27   | Cagliani R., 2005   | c.2875C>T              | p.Arg959Trp                           | 27    | Cagliani R., 2005   |
| 59   | F | DYSF  | c.2000-2004del         | p.Thr734ProfsX17    | 23   | <b>New</b>          | c.2000-2004del         | p.Thr734ProfsX17                      | 23    | <b>New</b>          |
| 60   | M | DYSF  | c.6233-6240delCCTTCAGC | p.Pro2078Leufs      | 55*  | <b>New</b>          | c.6233-6240delCCTTCAGC | p.Pro2078Leufs                        | 55*   | <b>New</b>          |
| 61   | F | DYSF  | c.3950A>G              | p.Arg1317Ser        | 37   | <b>New</b>          | c.3950A>G              | p.Arg1317Ser                          | 37    | <b>New</b>          |
| 62   | F | DYSF  | c.1254delC             | p.Pro418ProfsX123   | 13   | Guglieri M., 2007   | c.1020C>A              | p.Ser340Arg                           | 11    | Nguyen K., 2005     |
| 63.1 | F | DYSF  | c.1252G>A              | p.Gly618Arg         | 20   | <b>New</b>          | -                      | -                                     | -     | -                   |
| 63.2 | M | DYSF  | c.1252G>A              | p.Gly618Arg         | 20   | <b>New</b>          | -                      | -                                     | -     | -                   |
| 64   | F | DYSF  | c.1064_1065del         | p.Lys355ArgfsX4     | 12   | Krahn M.2009        | -                      | -                                     | -     | -                   |
| 65   | M | SGCG  | c.551T>G               | p.Val184Gly         | 6    | Guglieri M., 2007   | c.551T>G               | p.Val184Gly                           | 6     | Guglieri M., 2007   |
| 66   | M | SGCG  | c.525delT              | p.Phe175LeufsX20    | 6    | Ben Othmane K, 1992 | c.525delT              | p.Phe175LeufsX20                      | 6     | Ben Othmane K, 1992 |
| 67   | F | SGCG  | c.307C>G               | p.Leu103Val         | 3    | Guglieri M., 2007   | c.551T>G               | p.Val184Gly                           | 6     | Guglieri M., 2007   |
| 68   | M | SGCG  | c.848G>A               | p.Cys283Tyr         | 8    | Piccolo F, 1996     | c.848 G>A              | p.Cys283Tyr                           | 8     | Piccolo F, 1996     |
| 69   | M | SGCG  | c.525delT              | p.Phe175LeufsX20    | 6    | Ben Othmane K, 1992 | c.525delT              | p.Phe175LeufsX20                      | 6     | Ben Othmane K, 1992 |

|      |   |       |                  |                   |     |                          |                  |                  |      |                     |
|------|---|-------|------------------|-------------------|-----|--------------------------|------------------|------------------|------|---------------------|
| 70   | M | SGCA  | c.229C>T         | p.Arg77Cys        | 3   | Duggan DJ, 1997          | c.241C>T         | p.Arg81Ser       | 3    | Guglieri M., 2007   |
| 71.1 | F | SGCA  | c.850C>T         | p.Arg284Cys       | 7   | Duggan DJ, 1997          | c.850C>T         | p.Arg284Cys      | 7    | Duggan DJ, 1997     |
| 72.1 | M | SGCA  | c.850C>T         | p.Arg284Cys       | 7   | Duggan DJ, 1997          | c.850C>T         | p.Arg284Cys      | 7    | Duggan DJ, 1997     |
| 72.2 | F | SGCA  | c.850C>T         | p.Arg284Cys       | 7   | Duggan DJ, 1997          | c.850C>T         | p.Arg284Cys      | 7    | Duggan DJ, 1997     |
| 73.1 | M | SGCA  | c.241C>T         | p.Arg81Cys        | 4   | Guglieri M., 2007        | c.850C>T         | p.Arg284Cys      | 7    | Duggan DJ, 1997     |
| 73.2 | M | SGCA  | c. 241 C>T       | p.Arg81Cys        | 4   | Guglieri M., 2007        | c.850C>T         | p.Arg284Cys      | 7    | Duggan DJ, 1997     |
| 74   | F | SGCA  | c.739G>A         | p.Val247Met       | 6   | Moreira ES, 2003         | c.739G>A         | p.Val247Met      | 6    | Moreira ES, 2003    |
| 75.1 | F | SGCA  | c.271G>A         | p.Gly91Ser        | 3   | Guglieri M., 2007        | c.292C>T         | p.Arg98Cys       | 3    | Ljunggren A., 1995  |
| 75.2 | F | SGCA  | c.271G>A         | p.Gly91Ser        | 3   | Guglieri M., 2007        | c.292C>T         | p.Arg98Cys       | 3    | Ljunggren A., 1995  |
| 76   | M | SGCA  | c.307A>T         | p.Ile307Trp       | 3   | Guglieri M., 2007        | c.307A>T         | p.Ile307Phe      | 3    | Guglieri M., 2007   |
| 77   | M | SGCA  | c.622A>G         | p.Thr208Ala       | 3   | Guglieri M., 2007        | c.622A>G         | p.Thr208Ala      | 3    | Guglieri M., 2007   |
| 78   | M | SGCA  | c.850C>T         | p.Arg284Cys       | 7   | Duggan DJ, 1997          | c.850C>T         | p.Arg284Cys      | 7    | Duggan DJ, 1997     |
| 79   | F | SGCA  | c.850C>T         | p.Arg284Cys       | 7   | Duggan DJ, 1997          | c.850C>T         | p.Arg284Cys      | 7    | Duggan DJ, 1997     |
| 80   | M | SGCA  | c.935T>G         | p.Met312Arg       | 7   | Guglieri M., 2007        | c.935T>G         | p.Met312Arg      | 7    | Guglieri M., 2007   |
| 81.1 | F | SGCA  | c.739G>A         | p.Val247Met       | 6   | Moreira ES, 2003         | c.739G>A         | p.Val247Met      | 6    | Moreira ES, 2003    |
| 81.2 | F | SGCA  | c.739G>A         | p.Val247Met       | 6   | Moreira ES, 2003         | c.739G>A         | p.Val247Met      | 6    | Moreira ES, 2003    |
| 81.3 | F | SGCA  | c.739G>A         | p.Val247Met       | 6   | Moreira ES, 2003         | c.739G>A         | p.Val247Met      | 6    | Moreira ES, 2003    |
| 82   | F | SGCB  | c.341C>T         | p.Ser114Phe       | 3   | Duggan DJ, 1997          | c.341C>T         | p.Ser114Phe      | 3    | Duggan DJ, 1997     |
| 83.1 | F | SGCB  | c.377_384dup     | p.Gly128GlnfsX2   | 3   | Duggan DJ, 1997          | c.377_384 dup    | p.Gly128GlnfsX2  | 3    | Duggan DJ, 1997     |
| 83.2 | M | SGCB  | c.377_384dup     | p.Gly128GlnfsX2   | 3   | Duggan DJ, 1997          | c.377_384dup     | p.Gly128GlnfsX2  | 3    | Duggan DJ, 1997     |
| 84   | F | SGCB  | c.377_384dup     | p.Gly128GlnfsX2   | 3   | Duggan DJ, 1997          | c.377_384 dup    | p.Gly128GlnfsX2  | 3    | Duggan DJ, 1997     |
| 85   | M | SGCB  | c.85A>T          | p.Arg29X          | 2   | Cagliani R, 2001         | c.271C>T         | p.Arg91Cys       | 3    | Duclos F, 1998      |
| 86   | F | SGCB  | c.377_384dup     | p.Gly128GlnfsX2   | 3   | Duggan DJ, 1997          | c.377_384dup     | p.Gly128GlnfsX2  | 3    | Duggan DJ, 1997     |
| 87   | M | SGCD  | c.382+1_382+2del | Spl?              | IV5 | Guglieri M., 2007        | c.382+1_382+2del | spl?             | IV5  | Guglieri M., 2007   |
| 88   | F | FKRP  | c.826C>A         | p.Leu276Ile       | 4   | Brockington M, 2001      | c.1325C>T        | p.Pro442Leu      | 4    | Guglieri M., 2007   |
| 89.1 | M | FKRP  | c.826C>A         | p.Leu276Ile       | 4   | Brockington M, 2001      | c.1087G>C        | p.Val363Leu      | 4    | Leiden database     |
| 89.2 | M | FKRP  | c.826C>A         | p.Leu276Ile       | 4   | Brockington M, 2001      | c.1087G>C        | p.Val363Leu      | 4    | Leiden database     |
| 90   | M | FKRP  | c.826C>A         | p.Leu276Ile       | 4   | Brockington M, 2001      | c.826C>A         | p.Leu276Ile      | 4    | Brockington M, 2001 |
| 91   | M | FKRP  | c.826C>A         | p.Leu276Ile       | 4   | Brockington M, 2001      | c.826C>A         | p.Leu276Ile      | 4    | Brockington M, 2001 |
| 92   | F | FKRP  | c.826C>A         | p.Leu172Ile       | 4   | Brockington M, 2001      | c.826C>A         | p.Leu172Ile      | 4    | Brockington M, 2001 |
| 93   | M | FKRP  | c.826C>A         | p.Leu276Ile       | 4   | Brockington M, 2001      | c.826C>A         | p.Leu276Ile      | 4    | Brockington M, 2001 |
| 94   | M | FKRP  | c.956T>G         | p.Leu319Arg       | 4   | Guglieri M., 2007        | c.1136delG       | p.Arg379ArgfsX10 | 4    | Guglieri M., 2007   |
| 95   | M | FKRP  | c.826C>A         | p.Leu276Ile       | 4   | Brockington M, 2001      | c.993insC        | p.Val332ArgfsX57 | 4    | <b>New</b>          |
| 96   | M | ANO5  | c.397A>T         | p.Ile133Phe       | 7   | Magri F, 2012            | c.397A>T         | p.Ile133Phe      | 7    | Magri F, 2012       |
| 97   | M | ANO5  | c.220C>T         | p.Arg74X          | 5   | Magri F, 2012            | c.1609T>C        | p.Ser537Pro      | 15   | Magri F, 2012       |
| 98.1 | M | ANO5  | c.1627dupA       | p.Met543AsnfsX10  | 15  | Magri F, 2012            | c.1627dupA       | p.Met543AsnfsX10 | 15   | Magri F, 2012       |
| 98.2 | M | ANO5  | c.1627dupA       | p.Met543AsnfsX10  | 15  | Magri F, 2012            | c.1627dupA       | p.Met543AsnfsX10 | 15   | Magri F, 2012       |
| 99.1 | M | ANO5  | c.191dupA        | p.Asn64LysfsX15   | 5   | Brais B, 2010            | c.2516T>G        | p.Met839Arg      | 21   | Magri F, 2012       |
| 99.2 | F | ANO5  | c.191dupA        | p.Asn64LysfsX15   | 5   | Brais B, 2010            | c.2516T>G        | p.Met839Arg      | 21   | Magri F, 2012       |
| 100  | M | ANO5  | c.817C>T         | p.Leu273Phe       | 9   | Linssen WH, 2013         | c.2387C>T        | p.Ser796Leu      | 20   | Sarkozy A, 2012     |
| 101  | M | LAMA2 | c.6742delC       | p.Leu2248TrpfsX23 | 48  | <b>New</b>               | c.8544C>G        | p.His2848Gln     | 60   | <b>New</b>          |
| 102  | M | ISPD  | c.676T>C         | p.Tyr226His       | 3   | Vuillaumier-Barrot, 2012 | c.836-5T>G       | Spl?             | IVS5 | <b>New</b>          |
